# Supplementary material for: Morphological and mechanical properties of flexible resilin joints on damselfly wings (Rhinocypha spp.)
Source: PLOS journal article supplement (doi:10.1371/journal.pone.0193147), 2018-03-07
Supplement: S4 (10.1371/journal.pone.0193147.s004) [file journal.pone.0193147.s004]

**Nesamalar\_EditorialHouse**

**Translations/Proofreading/Editing Services**

Certified from Malaysian Institute of Translation and Books (ITBM)

**Facebook page:** @nesamalareditorialhouse

**Our ref:** ANM/5/2018

**Your ref:** PONE-D-17-21230R1

**Date:** 12/01/2018

To Academic Editor PLOS ONE,

Nesamalar\_EditorialHouse hereby certify that we have proofread this manuscript with the following details:

**Name of Candidate:** Noorhidayah Mamat

**Title of Manuscript:** Morphological and mechanical properties of flexible resilin joints on damselfly wings (*Rhinocypha* spp.)

This manuscript has been thoroughly checked for the English grammar and spellings. Hence, we are confident that this manuscript is fit for the final submission.

Certified,

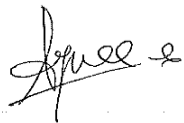

.....

Agnes Nesa Malar a/p Kandan Xavier

Certified Translator/Proofreader
